# Supplementary material for: Improved DNA Extraction and Illumina Sequencing of DNA Recovered from Aged Rootless Hair Shafts Found in Relics Associated with the Romanov Family
Source: Genes (Basel). 2022 Jan 23;13(2):202. doi: 10.3390/genes13020202 (PMC8872530; doi:10.3390/genes13020202)
Supplement: Supplementary file 1 [file genes-13-00202-s001.zip]

Archive with 8 entries (8 files):
- Supplementary Figure S1.PNG
- Supplementary Figure S2.PNG
- Supplementary Figure S3.pdf
- Supplementary Figure S4.PNG
- Supplementary Figure S5.PNG
- Supplementary Material #1 11042021.pdf
- Supplementary Material #2.pdf
- Supplementary Tables-Final.xlsx
