# Supplementary material for: Improved DNA Extraction and Illumina Sequencing of DNA Recovered from Aged Rootless Hair Shafts Found in Relics Associated with the Romanov Family
Source: Genes (Basel). 2022 Jan 23;13(2):202. doi: 10.3390/genes13020202 (PMC8872530; doi:10.3390/genes13020202)

## Supplementary Figure S3

### RAST Results for Lo5h-sh non-human reads

#### PHYLUM

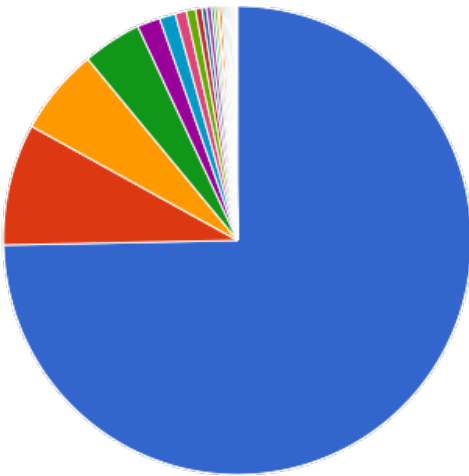

|                                      |                   |
|--------------------------------------|-------------------|
| Proteobacteria                       | - 16,416 (74.60%) |
| Bacteroidetes                        | - 1,842 (8.37%)   |
| Ascomycota                           | - 1,333 (6.06%)   |
| Actinobacteria                       | - 890 (4.04%)     |
| Planctomycetes                       | - 338 (1.54%)     |
| Firmicutes                           | - 244 (1.11%)     |
| Chordata                             | - 169 (0.77%)     |
| Verrucomicrobia                      | - 140 (0.64%)     |
| unclassified (derived from Viruses)  | - 95 (0.43%)      |
| Platyhelminthes                      | - 92 (0.42%)      |
| unclassified (derived from Bacteria) | - 52 (0.24%)      |
| Streptophyta                         | - 51 (0.23%)      |
| Acidobacteria                        | - 42 (0.19%)      |
| Cyanobacteria                        | - 35 (0.16%)      |

#### CLASS

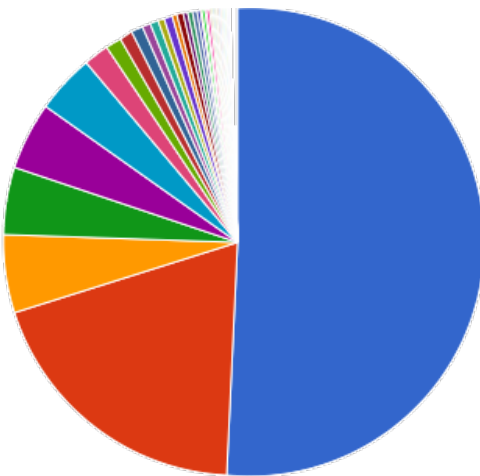

|                                     |                  |
|-------------------------------------|------------------|
| Betaproteobacteria                  | - 9,763 (50.66%) |
| Alphaproteobacteria                 | - 3,740 (19.41%) |
| Eurotiomycetes                      | - 1,039 (5.39%)  |
| Gammaproteobacteria                 | - 903 (4.69%)    |
| Actinobacteria (class)              | - 890 (4.62%)    |
| Flavobacteria                       | - 779 (4.04%)    |
| Planctomycetacia                    | - 338 (1.75%)    |
| Sphingobacteria                     | - 216 (1.12%)    |
| Cytophagia                          | - 175 (0.91%)    |
| Deltaproteobacteria                 | - 155 (0.80%)    |
| Bacilli                             | - 110 (0.57%)    |
| Bacteroidia                         | - 108 (0.56%)    |
| unclassified (derived from Viruses) | - 95 (0.49%)     |
| Trematoda                           | - 92 (0.48%)     |

## ORDER

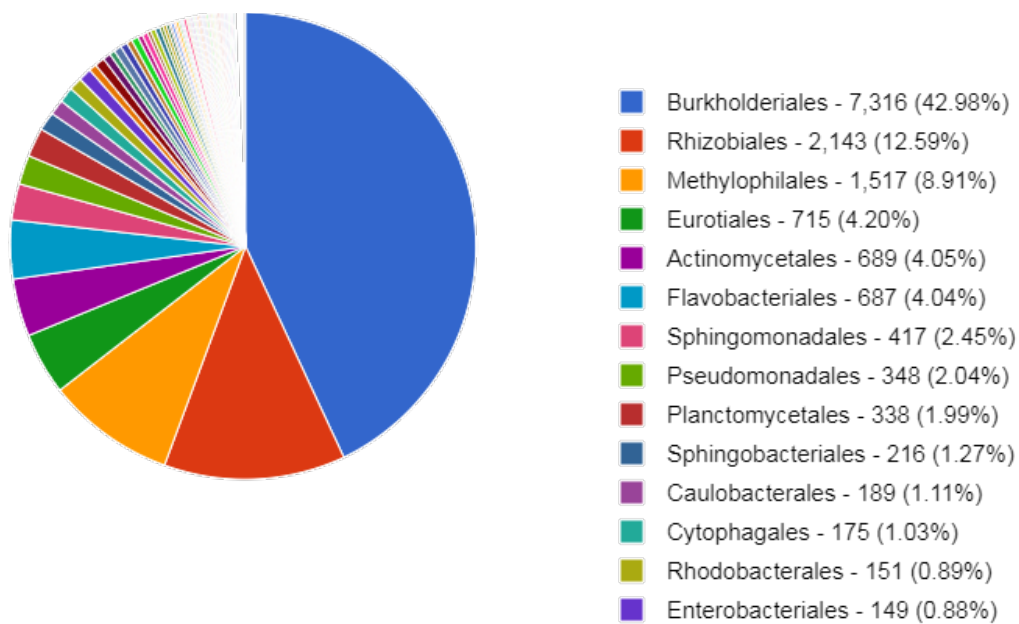

Supplement: Supplementary file 1 [file genes-13-00202-s001.zip › Supplementary Figure S3.pdf]
