# Supplementary figures and images for: Improved DNA Extraction and Illumina Sequencing of DNA Recovered from Aged Rootless Hair Shafts Found in Relics Associated with the Romanov Family
Source: MDPI journal article supplement (doi:10.3390/genes13020202), 2022-01-23

## Supplementary Figure S3

### RAST Results for Lo5h-sh non-human reads

#### PHYLUM

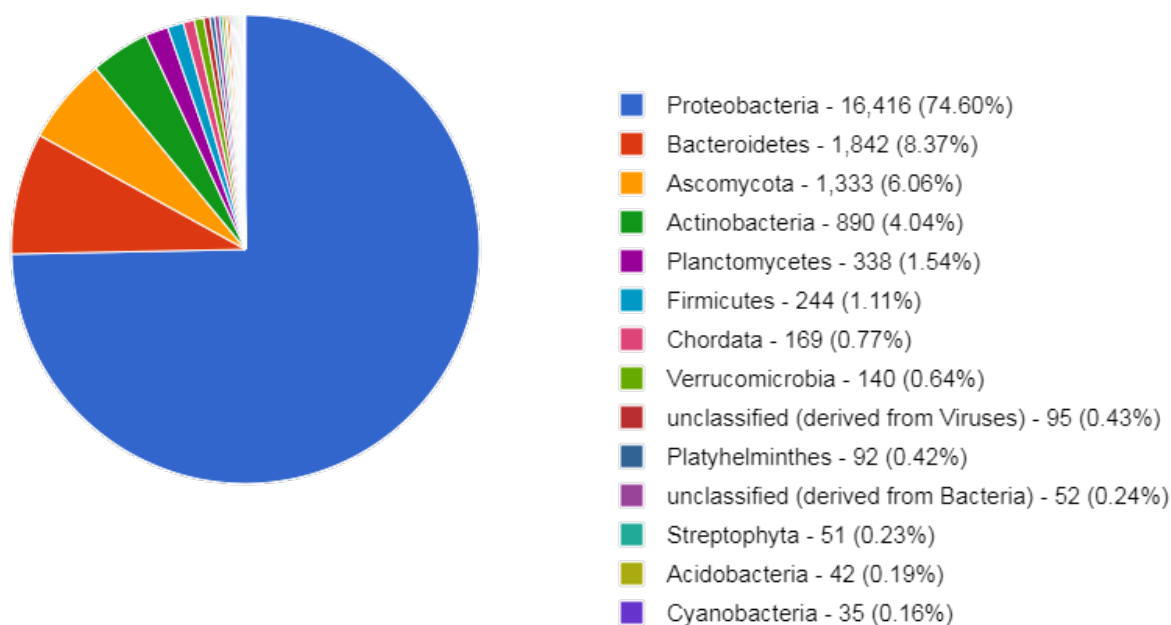

#### CLASS

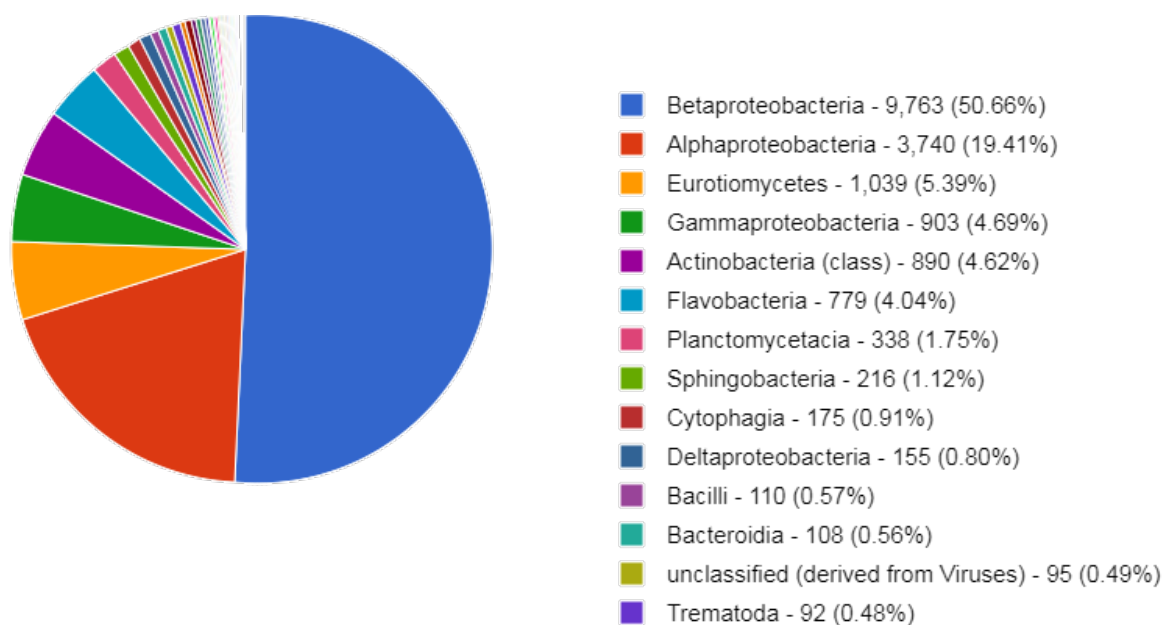

## ORDER

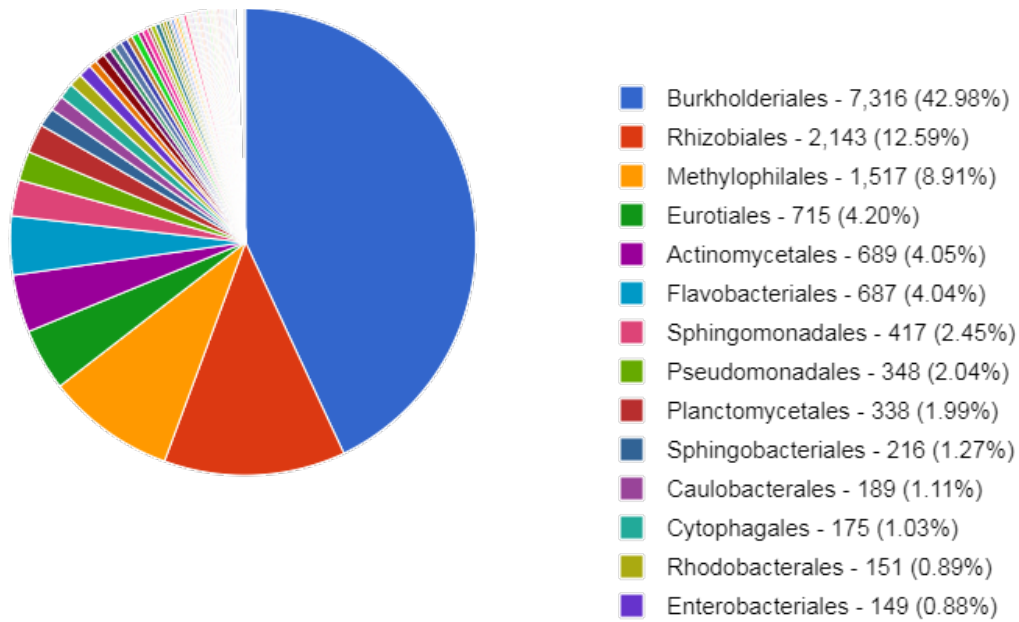

Supplement: s1 [file s1]
